# Supplementary material for: Down-Regulation of Ca2+-Activated K+ Channel KCa1.1 in Human Breast Cancer MDA-MB-453 Cells Treated with Vitamin D Receptor Agonists
Source: MDPI journal article supplement (doi:10.3390/ijms17122083), 2016-12-11
Supplement: s1 [file s1]

# Supplementary Materials: Down-Regulation of Ca<sup>2+</sup>-Activated K<sup>+</sup> Channel K<sub>Ca</sub>1.1 in Human Breast Cancer MDA-MB-453 Cells Treated with Vitamin D Receptor Agonists

Anowara Khatun, Mayu Fujimoto, Hiroaki Kito, Satomi Niwa, Takayoshi Suzuki and Susumu Ohya

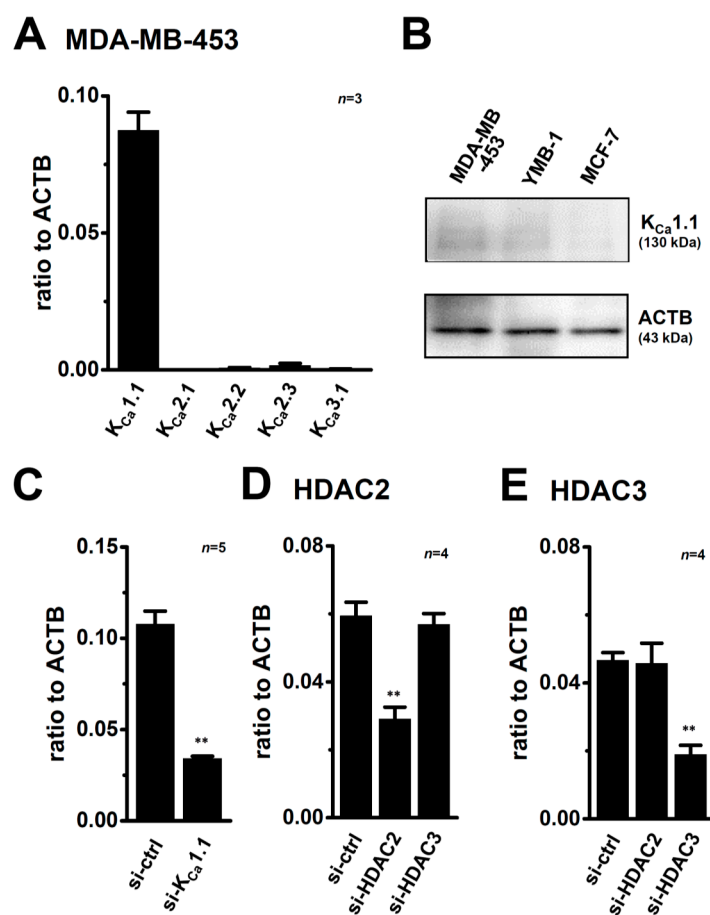

**Figure S1.** Expression of K<sub>Ca</sub> channel subtypes in MDA-MB-453 cells, the negative control in Western blotting for K<sub>Ca</sub>1.1, the inhibition of expression levels of K<sub>Ca</sub>1.1/HDAC2/HDAC3 transcripts by the transfection of K<sub>Ca</sub>1.1/HDAC2/HDAC3 siRNA, respectively. (A) Real-time PCR assays for K<sub>Ca</sub>1.1, K<sub>Ca</sub>2.1, K<sub>Ca</sub>2.2, K<sub>Ca</sub>2.3, and K<sub>Ca</sub>3.1 in MDA-MB-453 cells ( $n = 3$  for each). Expression levels were expressed as a ratio to ACTB; (B) Protein lysates of MDA-MB-453, YMB-1, and MCF-7 cells were probed by immunoblotting with anti-K<sub>Ca</sub>1.1 (upper panel) pretreated with excess antigens and anti-ACTB (lower panel) antibodies on the same filter; (C) Real-time PCR assay for K<sub>Ca</sub>1.1 in MDA-MB-453 cells transfected with control siRNA (si-ctrl) and K<sub>Ca</sub>1.1 siRNA (si-K<sub>Ca</sub>1.1) ( $n = 5$  for each); (D,E) Real-time PCR assay for HDAC2 (D) and HDAC3 (E) in MDA-MB-453 cells transfected with control siRNA (si-ctrl), HDAC2 siRNA (si-HDAC2), and HDAC3 siRNA (si-HDAC3) ( $n = 4$  for each). Results are expressed as means  $\pm$  SEM. \*\*:  $p < 0.01$  vs. si-ctrl.

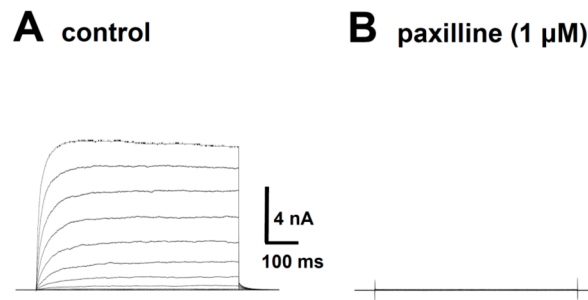

**Figure S2.** Effects of 1  $\mu$ M paxilline on outward  $K^+$  currents in MDA-MB-453 cells. Currents were elicited by depolarizing voltage-step to +40 mV from holding potential (−60 mV) with 10 mV increment (A); The currents were almost completely inhibited by application of 1  $\mu$ M paxilline (B).

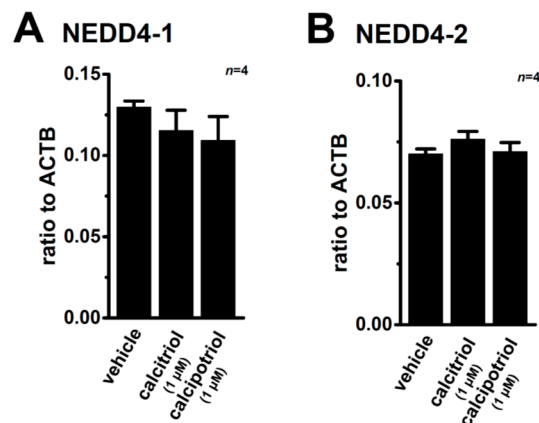

**Figure S3.** Effects of treatment with VDR agonists on transcriptional expression levels of E3 ubiquitin-protein ligases (NEDD4-1 and 4-2) in MDA-MB-453 cells. (A,B) Real-time PCR assay for NEDD4-1 (A), and NEDD4-2 (B) in VD agonist-treated MDA-MB-453 ( $n = 4$  for each). Expression levels were expressed as a ratio to ACTB. Results are expressed as means  $\pm$  SEM.
